# Supplementary material for: Copper Phosphide Nanowires as High-Performance Catalysts for Urea-Assisted Hydrogen Evolution in Alkaline Medium
Source: Materials (Basel). 2023 Jun 3;16(11):4169. doi: 10.3390/ma16114169 (PMC10254407; doi:10.3390/ma16114169)
Supplement: Supplementary file 1 [file materials-16-04169-s001.zip › materials-2397942-supplementary.pdf]

## Supporting Information

# Copper Phosphide Nanowires as High-Performance Catalysts for Urea-Assisted Hydrogen Evolution in Alkaline Medium

Hui Shen <sup>1</sup>, Tianran Wei <sup>2</sup>, Junyang Ding <sup>3,\*</sup> and Xijun Liu <sup>2,\*</sup>

<sup>1</sup> School of Bioengineering, Hefei Technology College, Hefei 230012, China

<sup>2</sup> State Key Laboratory of Featured Metal Materials and Life-Cycle Safety for Composite Structures, School of Resources, Environment and Materials, Guangxi University, Nanning 530004, China

<sup>3</sup> Institute for New Energy Materials & Low-Carbon Technologies, School of Materials Science and Engineering, Tianjin University of Technology, Tianjin 300384, China

\* Correspondence: junyangdingde18@163.com (J.D.); xjliu@tjut.edu.cn (X.L.)

## Supplementary Figures

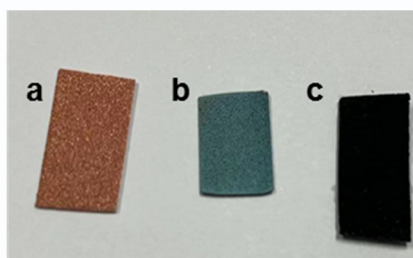

**Figure S1.** The optical pictures of copper foam (a),  $\text{Cu}(\text{OH})_2\text{-NW/CF}$  (b), and  $\text{Cu}_3\text{P-NW/CF}$  (c).

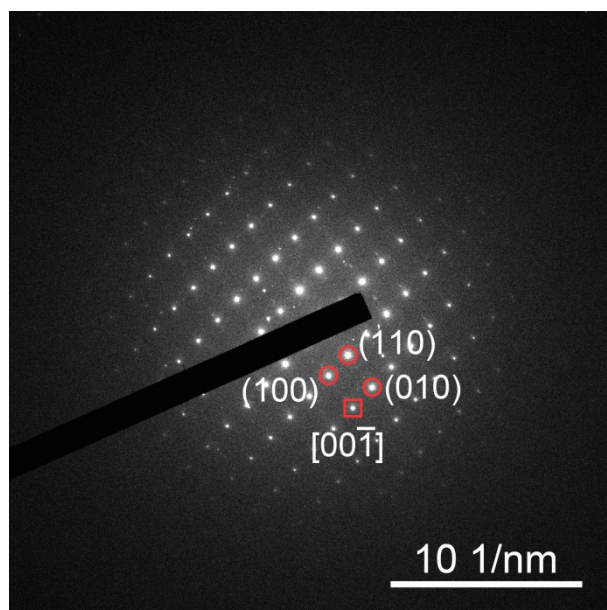

**Figure S2.** SAED pattern of Cu<sub>3</sub>P-NW/CF.

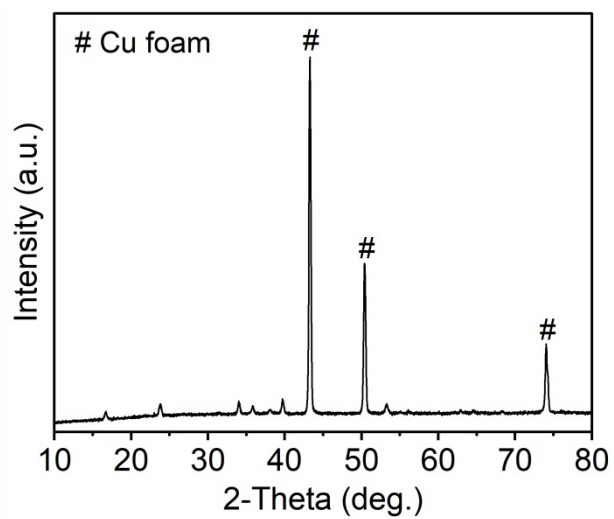

**Figure S3.** XRD pattern of  $\text{Cu}(\text{OH})_2\text{-NW/NF}$ .

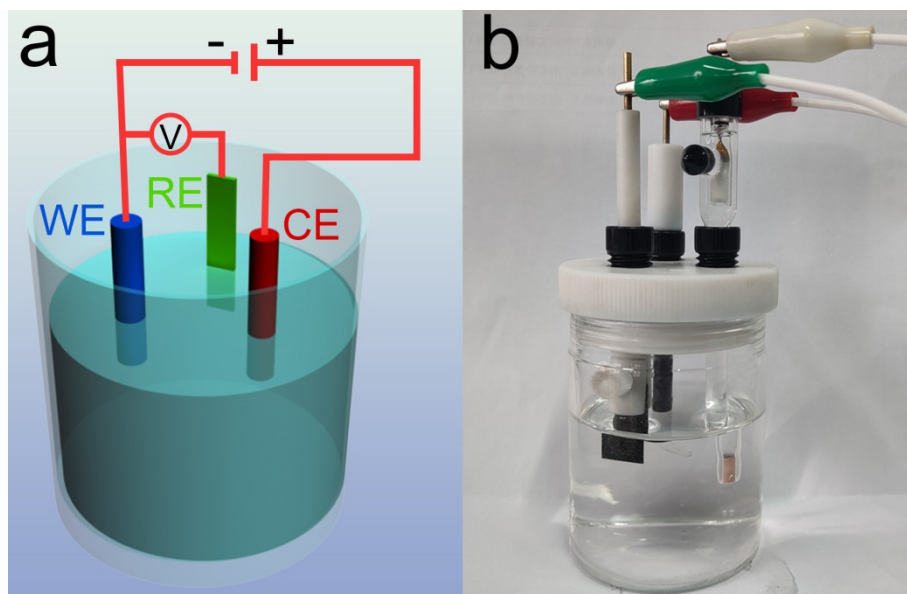

**Figure S4.** (a) Schematic diagram and (b) optical pictures of electrochemical tests.

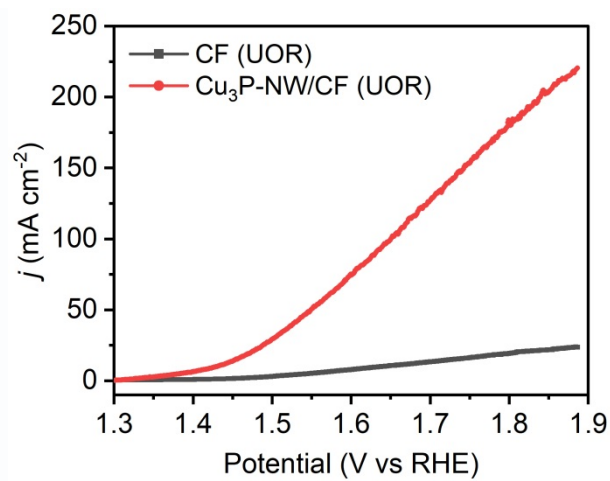

**Figure S5.** LSV curve of CF taken in 1.0 M KOH + 0.33 M urea.

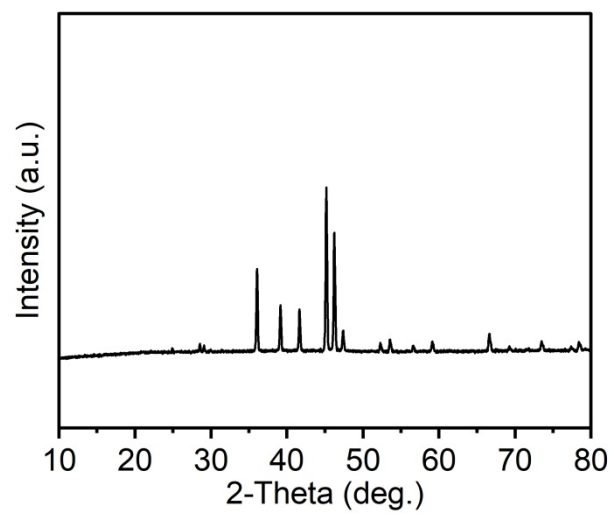

**Figure S6.** XRD pattern of Cu<sub>3</sub>P-P/CF.

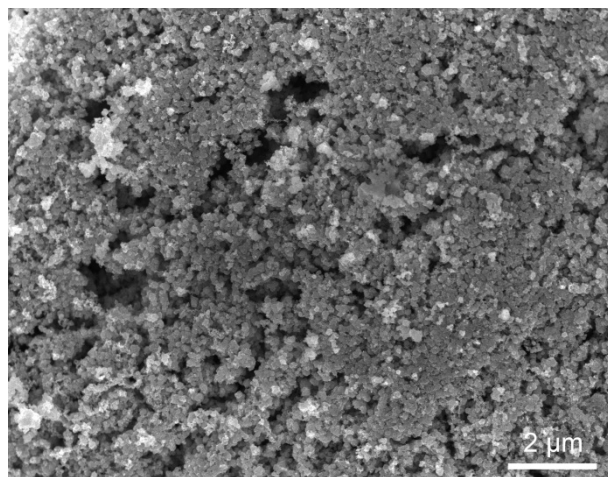

**Figure S7.** SEM image of Cu<sub>3</sub>P-P/CF.

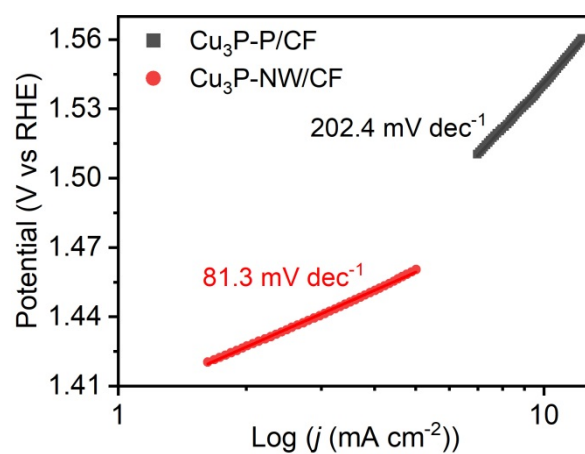

**Figure S8.** OER Tafel slopes of the two samples.

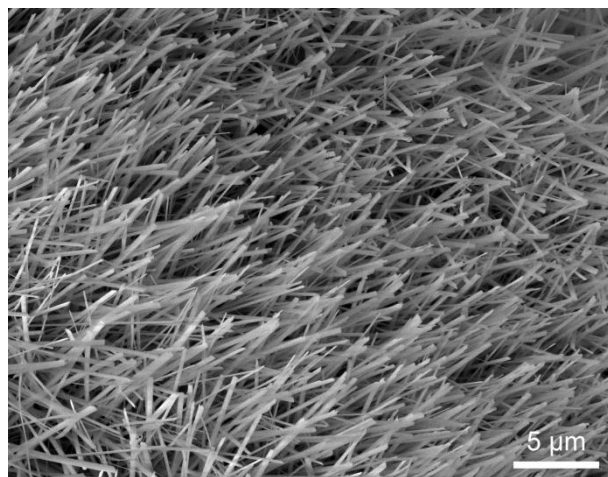

**Figure S9.** SEM image of  $\text{Cu}_3\text{P-NW/CF}$  recorded after the UOR stability test.

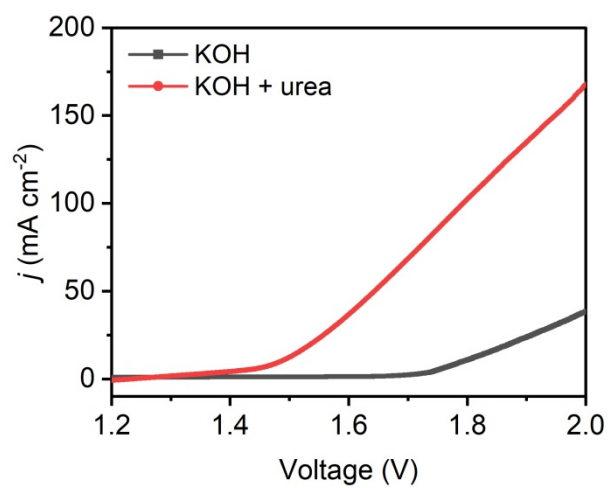

**Figure S10.** Polarization curves (without  $iR$  correction) of Cu<sub>3</sub>P-NW/CF for two-electrode electrolyzer in different electrolytes.

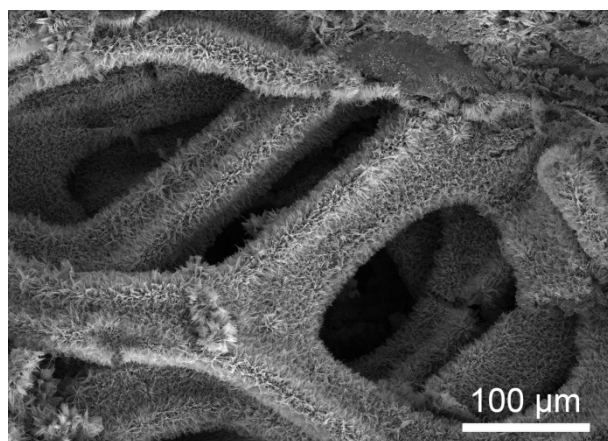

**Figure S11.** SEM image of Cu<sub>3</sub>P-NW/CF for the two-electrode urea-assisted system after the 30 h stability test at 100 mA cm<sup>-2</sup>.

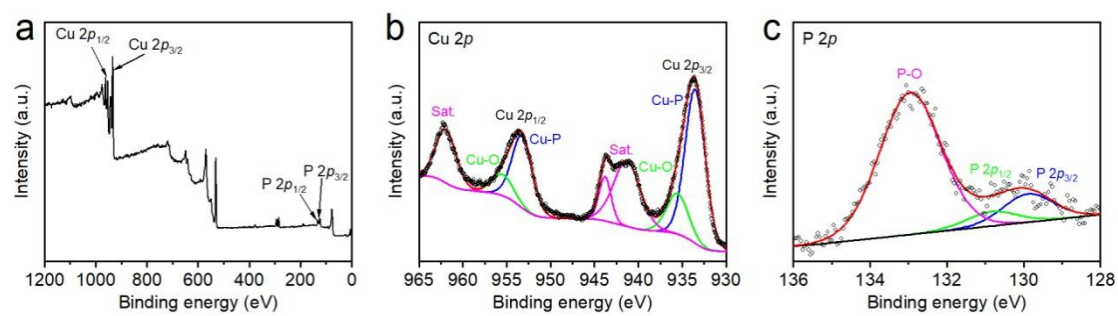

**Figure S12.** XPS analysis of Cu<sub>3</sub>P-NW/CF for the two-electrode urea-assisted system after the 30 h stability test at 100 mA cm<sup>-2</sup>. (a) XPS survey spectrum. High resolution (b) Cu 2p and (c) P 2p spectra.

Table S1. Comparison of the performance of urea-assisted electrolytic hydrogen production system with other reported catalysts.

| Catalyst                                                | Electrolyte              | Cell voltage at<br>100 mA cm <sup>-2</sup> | Stability                      | Ref.                                      |
|---------------------------------------------------------|--------------------------|--------------------------------------------|--------------------------------|-------------------------------------------|
| Cu <sub>3</sub> P-NW/CF                                 | 1 M KOH +<br>0.33 M urea | 1.79 V                                     | 100 mA cm <sup>-2</sup> , 30 h | This work                                 |
| c-CoNiP <sub>x</sub> /a-P-MnO <sub>y</sub>              | 1 M KOH +<br>0.5 M urea  | 1.66 V                                     | 50 mA cm <sup>-2</sup> , 40 h  | Chem. Eng. J., 2023, 454,<br>140380       |
| NC-FNCP                                                 | 1 M KOH +<br>0.5 M urea  | 1.82 V                                     | 10 mA cm <sup>-2</sup> , 20 h  | Nano Res., 2022, 15, 1916                 |
| O-NiMoP                                                 | 1 M KOH +<br>0.5 M urea  | 1.7 V                                      | 20 mA cm <sup>-2</sup> , 10 h  | Adv. Funct. Mater. 2021, 31,<br>2104951   |
| U-NiMn-LDH/CFC                                          | 1 M KOH +<br>0.5 M urea  | 1.98 V                                     | 15 mA cm <sup>-2</sup> , 40 h  | Appl. Catal. A Gen., 2021,<br>614, 118049 |
| Co <sub>0.26</sub> -Ni(OH) <sub>2</sub><br>NPs/CF       | 1 M KOH +<br>0.5 M urea  | 1.79 V                                     | 10 mA cm <sup>-2</sup> , 38 h  | J. Catal., 2020, 381, 454                 |
| NiCoP/CC                                                | 1 M KOH +<br>0.5 M urea  | 1.8 V                                      | 20 mA cm <sup>-2</sup> , 30 h  | J. Mater. Chem. A 2019, 7,<br>9078        |
| Fe <sub>11.1%</sub> -Ni <sub>3</sub> S <sub>2</sub> /NF | 1 M KOH +<br>0.33 M urea | 1.78 V                                     | 10 mA cm <sup>-2</sup> , 20 h  | J. Mater. Chem. A 2018, 6,<br>4346        |
